# Supplementary material for: Evaluating the Clinical Impact and Feasibility of Therapeutic Drug Monitoring of Pazopanib in a Real-World Soft-Tissue Sarcoma Cohort
Source: PubMed Central journal article supplement — Clin Pharmacokinet. 2024 Jul 16;63(7):1045–54. doi: 10.1007/s40262-024-01399-8 (PMC11271328; doi:10.1007/s40262-024-01399-8), 2024-07-16
Supplement: 40262_2024_1399_MOESM1_ESM.pdf [file 40262_2024_1399_MOESM1_ESM.pdf]

## **Evaluating the clinical impact and feasibility of therapeutic drug monitoring of pazopanib in a real-world soft tissue sarcoma cohort**

Marinda Meertens<sup>#1</sup>, Eline L. Giraud<sup>#2</sup>, Maud BA van der Kleij<sup>3,4</sup>, Kim Westerdijk<sup>5</sup>, Niels AD Guchelaar<sup>4</sup>, Roos F Bleckman<sup>6</sup>, Amy Rieborn<sup>7</sup>, Alex LT Imholz<sup>8</sup>, Hans-Martin Otten<sup>9</sup>, Annelie Vulink<sup>10</sup>, Maartje Los<sup>11</sup>, Paul Hamberg<sup>12</sup>, Winette TA van der Graaf<sup>3</sup>, Hans Gelderblom<sup>13</sup>, Dirk Jan AR Moes<sup>7</sup>, K. Esther Broekman<sup>6</sup>, Daan J Touw<sup>14</sup>, Stijn LW Koolen<sup>4,15</sup>, Ron HJ Mathijssen<sup>4</sup>, Alwin DR Huitema<sup>1,16,17</sup>, Nielka P van Erp<sup>2</sup>, Ingrid ME Desar<sup>5</sup>, Neeltje Steeghs<sup>3\*</sup>, On behalf of the Dutch Pharmacology Oncology Group (DPOG)

<sup>#</sup>Both authors contributed equally to this work.

<sup>1</sup>Department of Pharmacy & Pharmacology, The Netherlands Cancer Institute, Antoni van Leeuwenhoek, Amsterdam, The Netherlands

<sup>2</sup>Department of Pharmacy, Radboud University Medical Centre, Nijmegen, The Netherlands

<sup>3</sup>Department of Medical Oncology, The Netherlands Cancer Institute, Antoni van Leeuwenhoek, Amsterdam, The Netherlands

<sup>4</sup>Department of Medical Oncology, Erasmus MC Cancer Institute, Rotterdam, The Netherlands

<sup>5</sup>Department of Medical Oncology, Radboud University Medical Centre, Nijmegen, The Netherlands

<sup>6</sup>Department of Medical Oncology, University Medical Center Groningen, University of Groningen, Groningen, The Netherlands

<sup>7</sup>Department of Clinical Pharmacy and Toxicology, Leiden University Medical Center, Leiden, Netherlands

<sup>8</sup>Department of Medical Oncology, Deventer Hospital, Deventer, The Netherlands

<sup>9</sup>Department of Medical Oncology, Meander Medical Centre, Amersfoort, The Netherlands

<sup>10</sup>Department of Medical Oncology, Reinier de Graaf Hospital, Delft, The Netherlands

University of Groningen, Groningen, The Netherlands

<sup>11</sup>Department of Medical Oncology, St. Antonius Hospital, Nieuwegein, The Netherlands

<sup>12</sup>Department of Medical Oncology, Franciscus Gasthuis & Vlietland, Schiedam, The Netherlands

<sup>13</sup>Department of Medical Oncology, Leiden University Medical Center, Leiden, The Netherlands

<sup>14</sup>Department of Clinical Pharmacy and Pharmacology, University Medical Center Groningen, The Netherlands

<sup>15</sup>Department of Pharmacy, Erasmus University Medical Center, Rotterdam, The Netherlands

<sup>16</sup>Department of Clinical Pharmacy, Utrecht University Medical Centre, Utrecht, The Netherlands

<sup>17</sup>Department of Pharmacology, Princess Máxima Centre for Pediatric Oncology, Utrecht, The Netherlands

\*Corresponding author: n.steeghs@nki.nl

## Supplemental Material

**Table S1.** univariate and multivariate cox-regression on progression-free survival.

| Variable                                              | Univariate analysis |         | Multivariate analysis |         |
|-------------------------------------------------------|---------------------|---------|-----------------------|---------|
|                                                       | HR (95%CI)          | P-value | HR (95%CI)            | P-value |
| Performance status $\geq 2$ vs. 0-1                   | 1.76 (0.80 – 3.85)  | 0.157   | 1.95 (0.85 – 4.46)    | 0.113   |
| Subtype Soft-Tissue Sarcoma:                          |                     |         |                       |         |
| Leiomyosarcoma vs. all other subtypes                 | 1.16 (0.75 – 1.80)  | 0.497   | 1.17 (0.75 – 1.84)    | 0.478   |
| Synovial sarcoma vs. all other subtypes               | 1.02 (0.52 – 2.00)  | 0.945   | 1.09 (0.55 – 2.15)    | 0.806   |
| Previous lines of systemic treatment $\geq 2$ vs. 0-1 | 1.17 (0.71 – 1.92)  | 0.546   | 1.00 (0.59 – 1.72)    | 0.988   |
| TDM-guided dosing vs. no-TDM guided dosing            | 0.79 (0.50 – 1.26)  | 0.327   | 0.77 (0.47 – 1.25)    | 0.287   |

CI confidence interval, TDM therapeutic drug monitoring

**Table S2.** univariate and multivariate cox-regression on overall survival.

| Variable                                              | Univariate analysis |         | Multivariate analysis |         |
|-------------------------------------------------------|---------------------|---------|-----------------------|---------|
|                                                       | HR (95%CI)          | P-value | HR (95%CI)            | P-value |
| Performance status $\geq 2$ vs. 0-1                   | 3.12 (1.48 – 6.57)  | 0.003*  | 2.99 (1.38 – 6.50)    | 0.005*  |
| Subtype Soft-Tissue Sarcoma:                          |                     |         |                       |         |
| Leiomyosarcoma vs. all other subtypes                 | 0.58 (0.37 – 0.90)  | 0.016*  | 0.58 (0.37 – 0.91)    | 0.018*  |
| Synovial sarcoma vs. all other subtypes               | 0.57 (0.27 – 1.22)  | 0.148   | 0.62 (0.29 – 1.32)    | 0.214   |
| Previous lines of systemic treatment $\geq 2$ vs. 0-1 | 1.12 (0.69 – 1.81)  | 0.641   | 1.08 (0.65 – 1.79)    | 0.780   |
| TDM-guided dosing vs. no-TDM guided dosing            | 0.94 (0.58 – 1.51)  | 0.786   | 0.95 (0.57 – 1.60)    | 0.858   |

CI confidence interval, TDM therapeutic drug monitoring

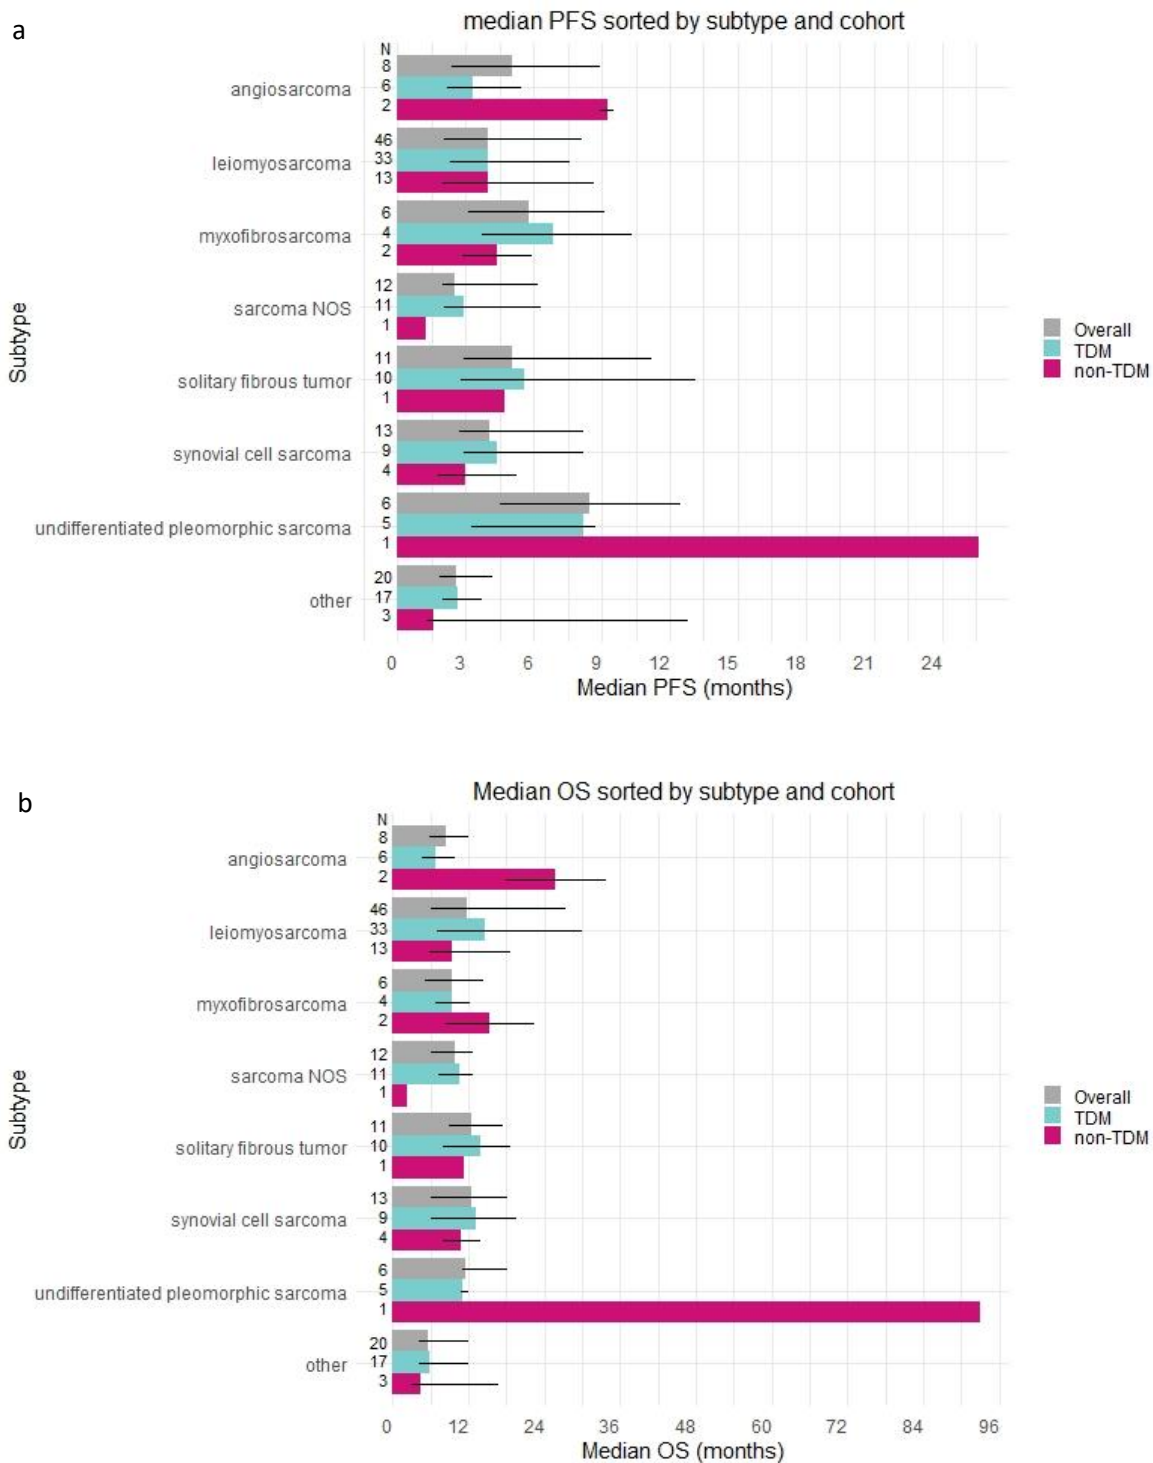

**Fig. S1** Median progression-free survival (a) and median overall survival (b) sorted by subtype and cohort. N number, NOS not otherwise specified, OS overall survival, PFS progression-free survival, TDM therapeutic drug monitoring. Other is a sum of all patients with subtypes including <5 patients. These include among others malignant peripheral nerve sheath tumor (n=4), liposarcoma (n=3), epithelioid hemangioendothelioma (n=2), rhabdomyosarcoma (n=2) and intima sarcoma (n=2).

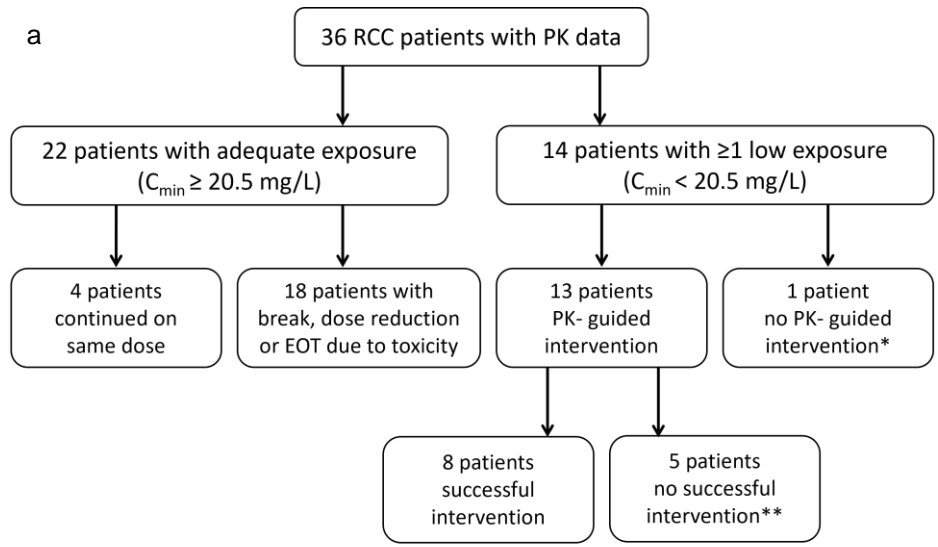

\* Due to toxicity

\*\* Due to: still low PK after intervention (1) and toxicity (4)

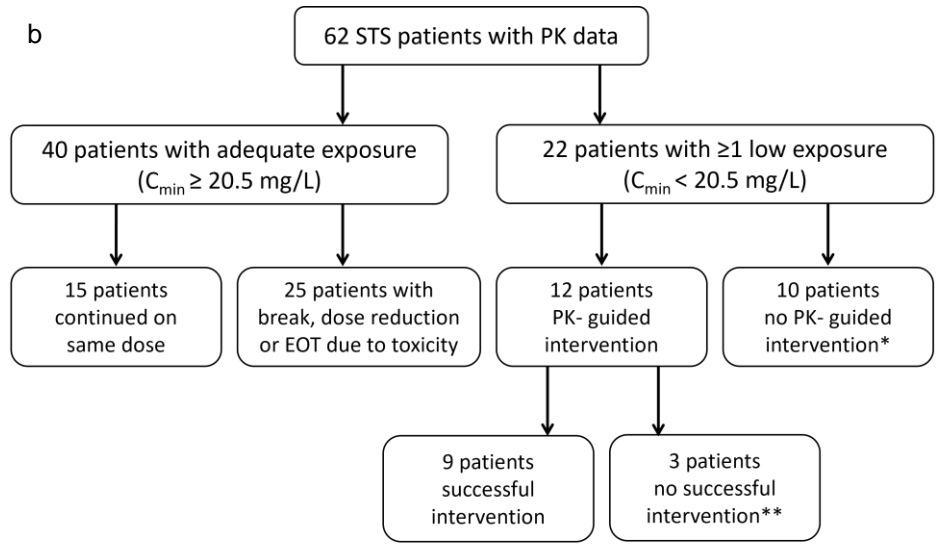

\* Due to: toxicity (4), treatment discontinued (3), physician adherence (2), logistics (1)

\*\* Intervention not evaluable (3)

**Fig. S2** Feasibility analysis for metastatic renal cell cancer (a) and soft-tissue sarcoma (b).  $C_{min}$  trough concentration, EOT end of treatment, PK pharmacokinetic, RCC renal cell carcinoma
